# Supplementary material for: Selenium atom on phosphate enhances specificity and sensitivity of DNA polymerization and detection
Source: Royal Society of Chemistry journal article supplement (doi:10.1039/d1tb00428j), 2021-01-01
Supplement: d1tb00428j1.pdf [file d1tb00428j1.pdf]

## Supplementary Information

### Selenium atom on phosphate enhances specificity and sensitivity of DNA polymerization and detection

Guangcheng Luo<sup>1, 2#</sup>, Jun Zhang<sup>1#</sup>, Mei Yang<sup>1</sup>, Hongfei He<sup>1</sup>, Zhen Huang<sup>1, 3\*</sup>

<sup>1</sup>Key Laboratory of Bio-Resource and Eco-environment of Ministry of Education, College of Life Sciences, Sichuan University, Chengdu, Sichuan, China.

<sup>2</sup>Department of Clinical Laboratory, Affiliated Hospital of North Sichuan Medical College, Nanchong, Sichuan, China.

<sup>3</sup>SeNA Research Institute and Szostak-CDHT Large Nucleic Acids Institute, Chengdu, Sichuan, China.

\*To whom correspondence should be addressed at email: [huang@senaresearch.org](mailto:huang@senaresearch.org)

#contributed equally to the work.

#### Negative controls:

Since this method was initially developed for pathogenic bacteria detection, *E. coli* genomic DNA was selected. Later, we also tested our method with human genomic DNA, and no difference was observed between *E. coli* and human genomic DNAs, as the negative controls.

**Table S1 Primer sequences of LAMP and PCR for HPV detection.**

| Primer name  | Sequence (5' → 3')                                        |
|--------------|-----------------------------------------------------------|
| Primer Set 1 | A1F3 CAGACGATTTATACATTAAGGC (PCR primer F1)               |
|              | A1B3 TGGCAGCACATAATGACAT (PCR primer B1)                  |
|              | A1FIP TCAGAGGTAACCATAGAACCTAGTCTACTGCAAATTTAGCCAGT<br>T   |
|              | A1BIP CGAGCACAGGGCCACAATAATGCGTGTAGTATCAACAACA            |
| Primer Set 2 | A2F3 ACAGTTTATTTTCAACTGTGC (PCR primer F2)                |
|              | A2B3 TTAGGTGCTGGAGGTGTA (PCR primer B2)                   |
|              | A2FIP AGTCCTCCAAAATAGTGGAATTCATAAATAACCTTAACTGCAGACG<br>T |
|              | A2BIP GAATTTTGGTCTACAACCTCCCCTGACAAGCAATTGCCTGG           |
| Primer Set 3 | A3F3 GCCATATCTACTTCAGAACTACA (PCR primer F3)              |

A3B3 GCCTGGGATGTTACAAACC (PCR primer B3)  
A3FIP ACGTCTGCAGTTAAGGTTATTTTGCACTTTAAGGAGTACCTACGAC  
A3BIP TGAATTCCACTATTTTGGAGGACTGTTCTAGTGTGCCTCCTGG

|                     |       |                                                  |
|---------------------|-------|--------------------------------------------------|
| <b>Primer Set 4</b> | A4F3  | TGGCATTGTTGGGGTAA (PCR primer F4)                |
|                     | A4B3  | ATGTATGTATGTCATAACGTCTG (PCR primer B4)          |
|                     | A4FIP | TCTGAAGTAGATATGGCAGCACATAGTTACTGTTGTTGATACTACACG |
|                     | A4BIP | TAAGGAGTACCTACGACATGGGAGGTTATTTTGCACAGTTGAA      |

**Table S2 LAMP Primer set for COVID-19 RNA detection.**

| Primer name | Sequence (5' → 3')                          |
|-------------|---------------------------------------------|
| COV-F3      | GCCAAAAGGCTTCTACGCA                         |
| COV-B3      | TTGCTCTCAAGCTGGTTCAA                        |
| COV-LF      | GCGACTACGTGATGAGGAACG                       |
| COV-LB      | AATGGCGGTGATGCTGCTCT                        |
| COV-FIP     | TCCCCTACTGCTGCCTGGAGCGGCAGTCAAGCCTCTTC      |
| COV-BIP     | TTCTCCTGCTAGAAATGGCTGGCTCTGTCAAGCAGCAGCAAAG |

**Table S3 Analysis of dNTP $\alpha$ Se incorporation into DNA by ICP-MS**

|                                             | Reaction 1 | Reaction 2 | Reaction 3 | Reaction 4 | Reaction 5 | Average |
|---------------------------------------------|------------|------------|------------|------------|------------|---------|
| <b>Se in initial reaction mixture (ppb)</b> | 36.7       | 39.5       | 41.6       | 38.5       | 34.1       | 38.1    |
| <b>Se in purified products (ppb)</b>        | 23.1       | 28.4       | 26.5       | 23.3       | 19.5       | 24.1    |
| <b>Se-Incorporation (%)</b>                 | 62.9       | 71.9       | 63.6       | 60.3       | 57.2       | 63.4    |

The SEA experiments with five HPV16 positive samples were performed with the buffer containing dNTP $\alpha$ Se (0.125 mM) in the total dNTP (1.125 mM). Before reaction, the Se concentration in the

original reaction mixture was analyzed by ICP-MS. After reaction, the SEA product was purified by TIANquick Mini Purification Kit, then the Se concentration in SEA products was analyzed by ICP-MS. This study has indicated the dNTP $\alpha$ Se incorporation up to 63.4%, relative to its composition in the total dNTPs.

**Table S4 Quantitative analysis of the specificity enhancement (or background suppression) by SEA**

| Primer Sets       | Normalized LAMP Background (Figure 3G) | Normalized SEA Background (Figure 3H) | Relative Background Suppression by SEA (folds) |
|-------------------|----------------------------------------|---------------------------------------|------------------------------------------------|
| Primer Set 1 (N1) | 83900                                  | 666                                   | 126                                            |
| Primer Set 2 (N2) | 63100                                  | 3110                                  | 20                                             |
| Primer Set 3 (N3) | 50100                                  | 878                                   | 57                                             |
| Primer Set 4 (N4) | 56900                                  | 1440                                  | 40                                             |

The normalized background values were from the area grey values in the gel lanes of the negative controls from Figure 3G and 3H.

**Table S5 Quantitative analysis of the sensitivity enhancement (signal facilitation) by SEA**

| Primer Sets             | SEA SNR (Figure 3H) | LAMP SNR (Figure 3G) | Sensitivity Enhancement by SEA (folds) |
|-------------------------|---------------------|----------------------|----------------------------------------|
| Primer Set 1 (P1 vs N1) | 80.7                | 1.2                  | 69.1                                   |
| Primer Set 2 (P2 vs N2) | 42.5                | 1.0                  | 43.8                                   |
| Primer Set 3 (P3 vs N3) | 89.6                | 0.9                  | 103.4                                  |
| Primer Set 4 (P4 vs N4) | 50.9                | 0.8                  | 61.0                                   |

SNR (signal to noise ratio) refers to ratios of the area grey values in the gel lanes between the positive samples and negative controls. The SNR values of SEA and LAMP were calculated from Figure 3H and 3G, respectively.

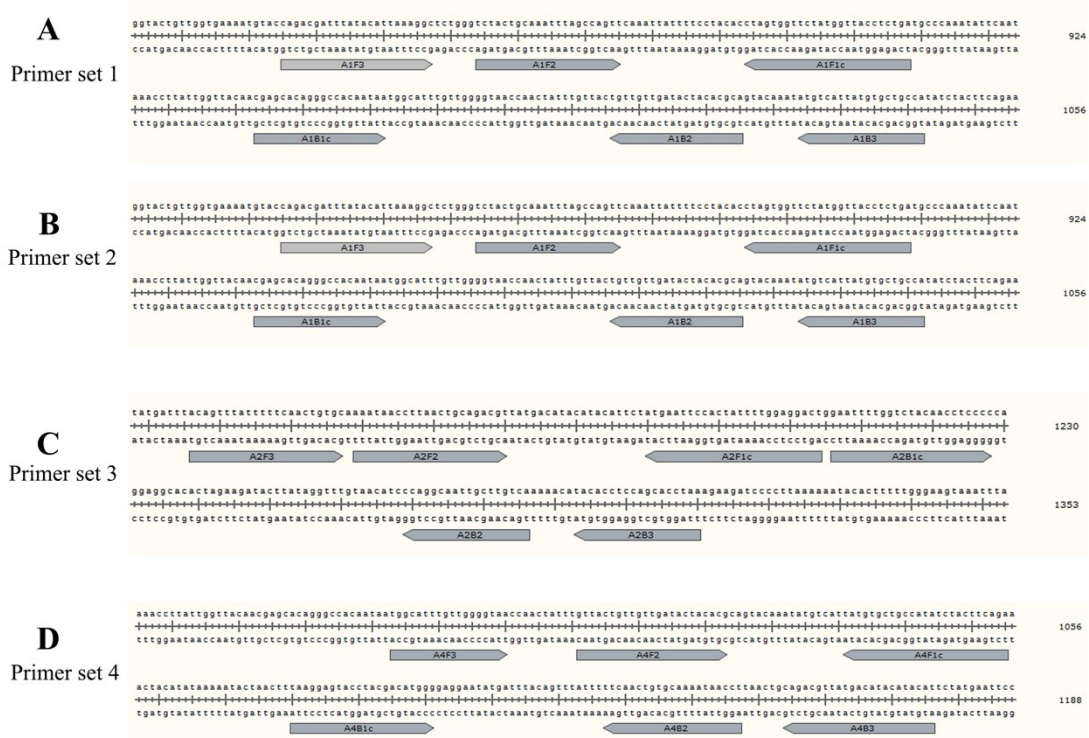

**Figure S1.** HPV16-L1 gene fragment labeled with the LAMP primers. (A) HPV16-L1 gene fragment labeled with Primer Set 1; (B) HPV16-L1 gene fragment labeled with Primer Set 2; (C) HPV16-L1 gene fragment labeled with Primer Set 3; (D) HPV16-L1 gene fragment labeled with Primer Set 4.

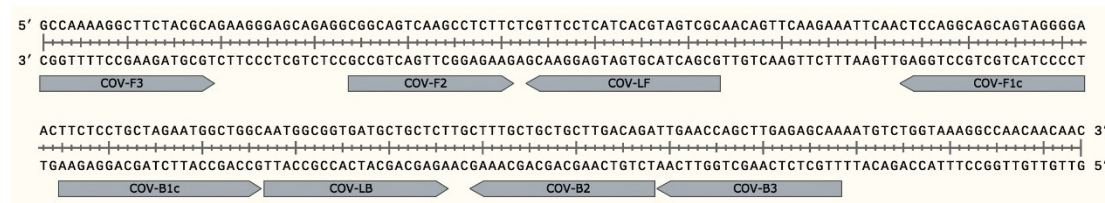

**Figure S2.** COVID-19 gene fragment labeled with the LAMP primers.

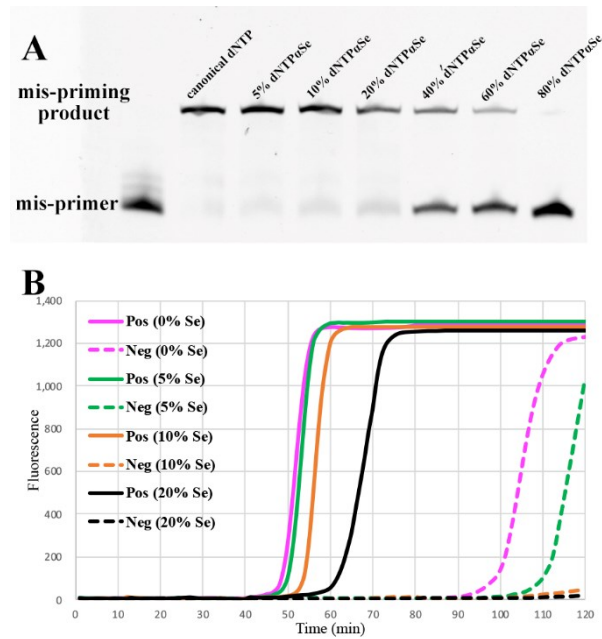

**Figure S3. The dNTP $\alpha$ Se-dose dependence of SEA specificity.** (A) dNTP $\alpha$ Se-dose dependence of mis-priming suppression. The template sequence (48 nt): 5'-tctgaagtagatgatggcagcacatagttactgt-tgttgatactacag-3'; The FAM-labeled mis-primer sequence (18 nt): 5'-FAM-cgtgtagtatcaaca**ctga**-3' (the boxed characters referred to mismatched bases). The nonspecific products were decreased with the increase of dNTP $\alpha$ Se concentration. (B) dNTP $\alpha$ Se-dose dependence of SEA specificity. The Ct values of negative controls increased with the growing of dNTP $\alpha$ Se concentration, suggesting that the SEA specificity enhancement with dNTP $\alpha$ Se.

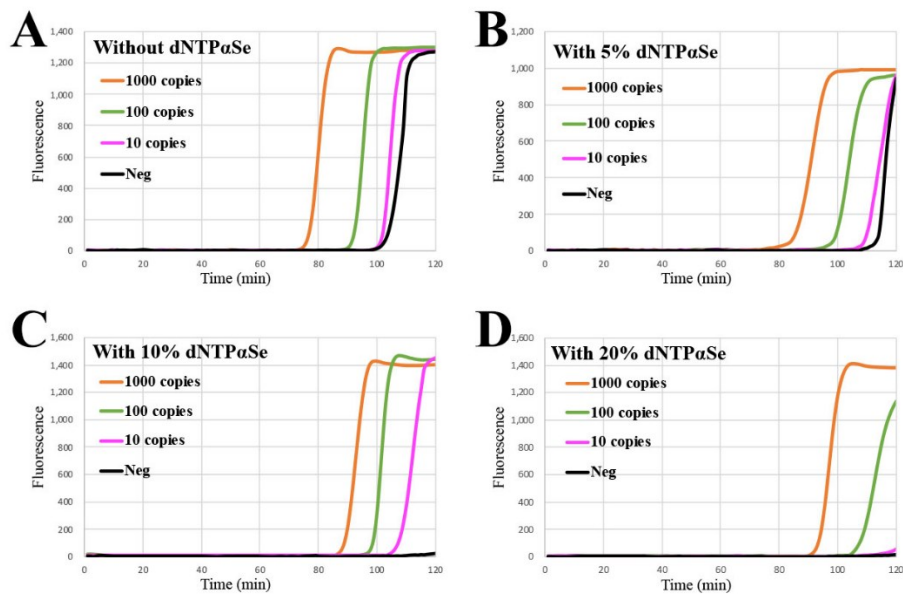

**Figure S4. The optimization of dNTP $\alpha$ Se concentrations for SEA amplification.** The SEA experiments were carried out with various concentrations of dNTP $\alpha$ Se. When 10% canonical dNTP was replaced by dNTP $\alpha$ Se, our SEA strategy achieved both highest specificity and sensitivity. (A) without dNTP $\alpha$ Se. (B, C and D) with 5, 10 and 20% dNTP $\alpha$ Se, respectively.
